# Supplementary material
Source: HighWire-hosted journal article supplement (https://jnm.snmjournals.org/highwire/filestream/94183/field_highwire_adjunct_files/0/jnm085456_Supplemental_Figures.pdf)
Supplement: jnm085456_Supplemental_Figures.pdf [file jnm085456_Supplemental_Figures.pdf]

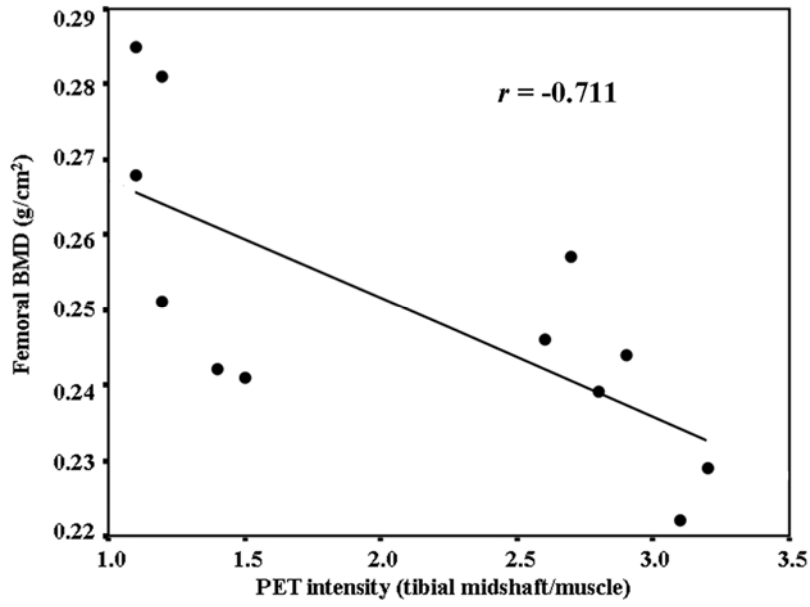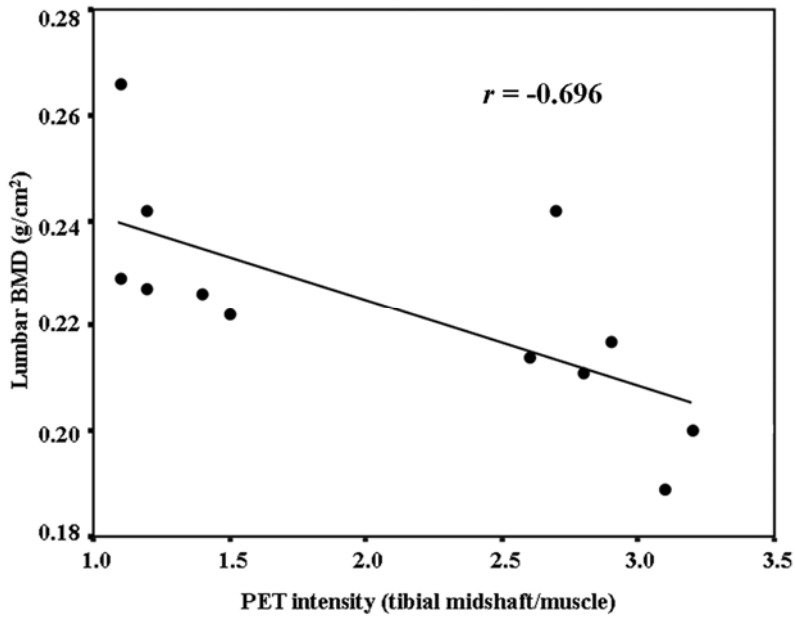

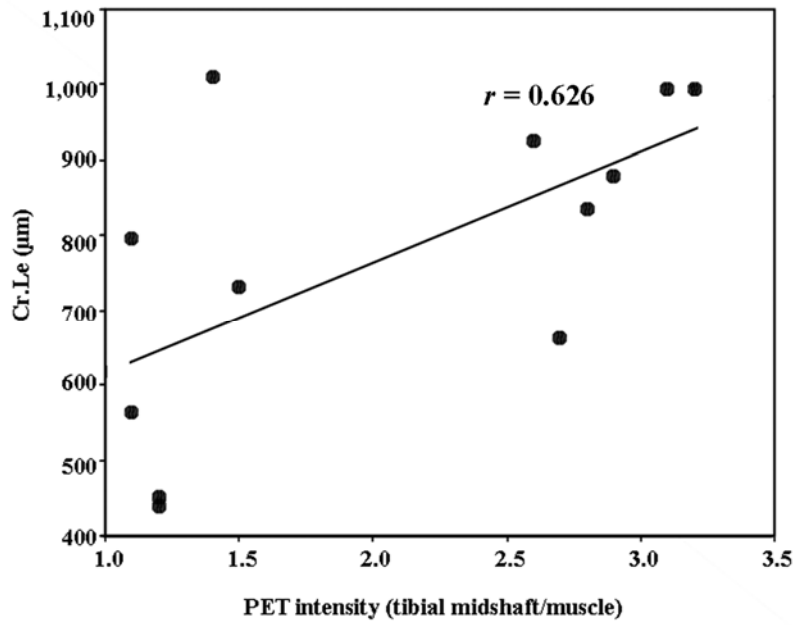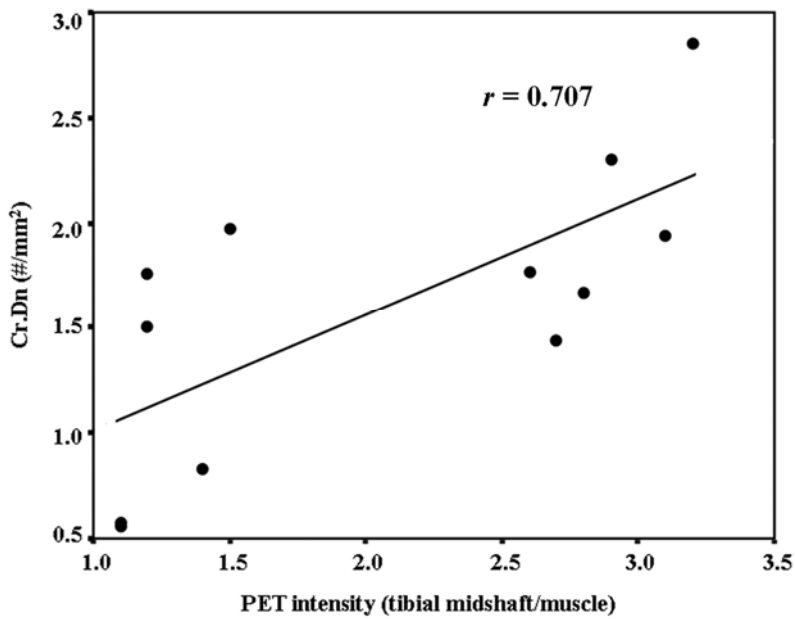

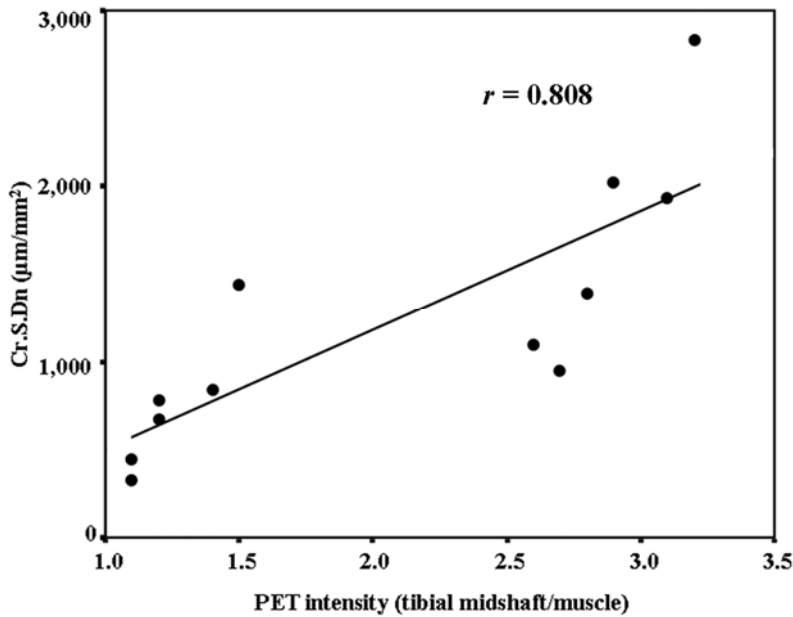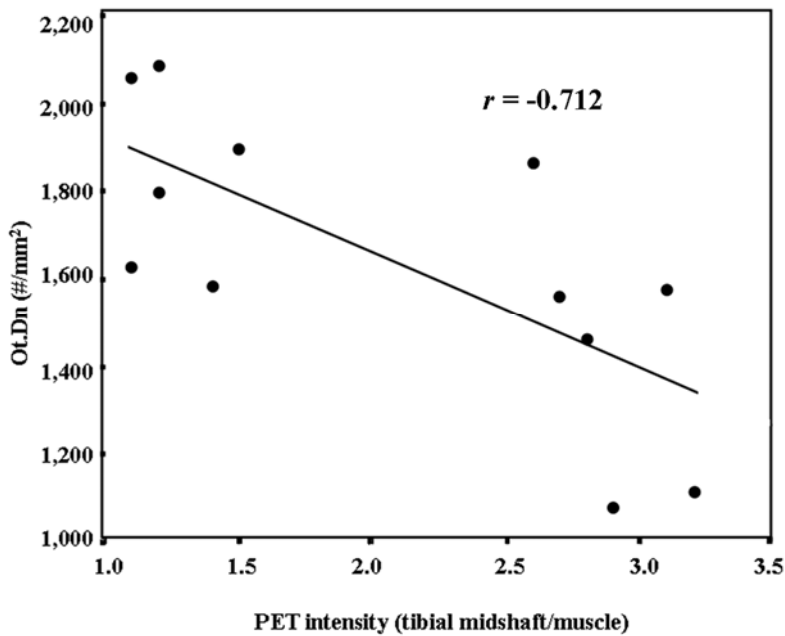

**FIGURE 1.** Correlation between PET intensity and BMD or microdamage histomorphology (Cr.Le, Cr.Dn and Cr.S.Dn) or Ot.Dn in loaded limbs. **(A)** Correlation between PET intensity and femoral BMD (n=12,  $P<0.05$ ); **(B)** Correlation between PET intensity and lumbar BMD (n=12,  $P<0.05$ ); **(C)** Correlation between PET intensity and Cr.Le (n=12,  $P<0.05$ ); **(D)** Correlation between PET intensity and Cr.Dn (n=12,  $P<0.05$ ); **(E)** Correlation between PET intensity and Cr.S.Dn (n=12,  $P<0.05$ ); **(F)** Correlation between PET intensity and

Ot.Dn (n=12, P<0.05)

Cr.Le: microcrack length; Cr.Dn: microcrack density; Cr.S.Dn: microcrack surface density; Ot.Dn: osteocyte lacunar density

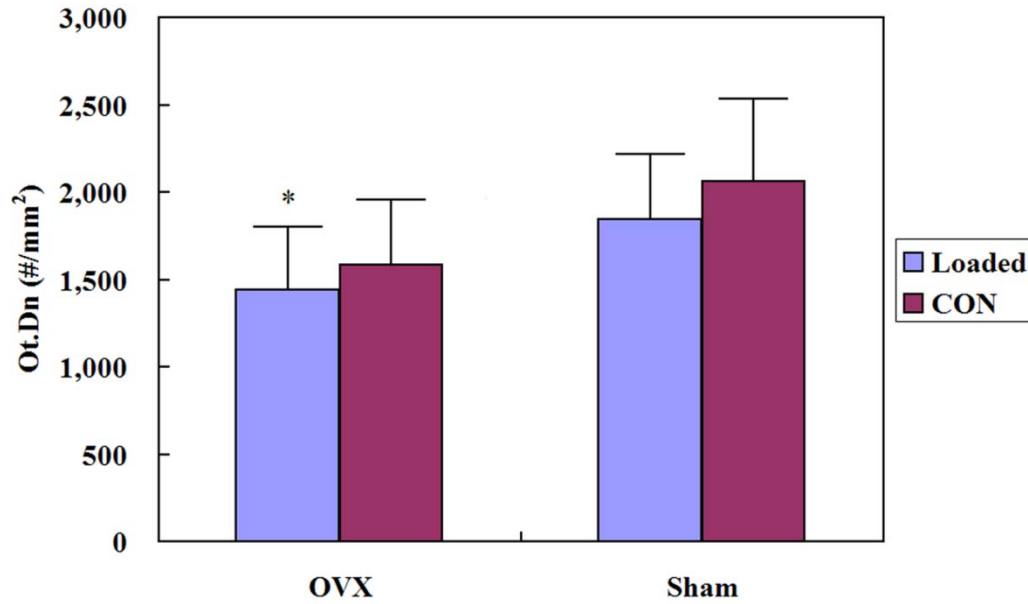

**FIGURE 2.** Ot.Dn was significantly lower ( $P < 0.05$ ) in loaded tibiae of the OVX group than those in the loaded tibiae of the Sham group. Data were expressed as means $\pm$ SD (n=6 in each group)

\* $P < 0.05$ ,  $\Delta$ Ot.Dn in OVX vs.  $\Delta$ Ot.Dn in Sham

Ot.Dn: osteocyte lacunar density
